# Supplementary material for: Fruit and Vegetable Intake in Relation to Lower Urinary Tract Symptoms and Erectile Dysfunction Among Southern Chinese Elderly Men: A 4-Year Prospective Study of Mr OS Hong Kong
Source: PubMed Central journal article supplement — Medicine (Baltimore). 2016 Jan 29;95(4):e2557. doi: 10.1097/MD.0000000000002557 (PMC5291566; doi:10.1097/md.0000000000002557), 2016-01-29

**Title: Fruit and vegetable intake in relation to lower urinary tract symptoms and erectile dysfunction among Southern Chinese elderly men - a four-year prospective study of Mr OS Hong Kong**

**First author: Zhao-min Liu (PhD)**

**Supplemental Figure 1 Adjusted mean of absolute changes of IPSS in overall symptoms at 4-year follow-up by low, moderate and high fruit and/or vegetable intake**

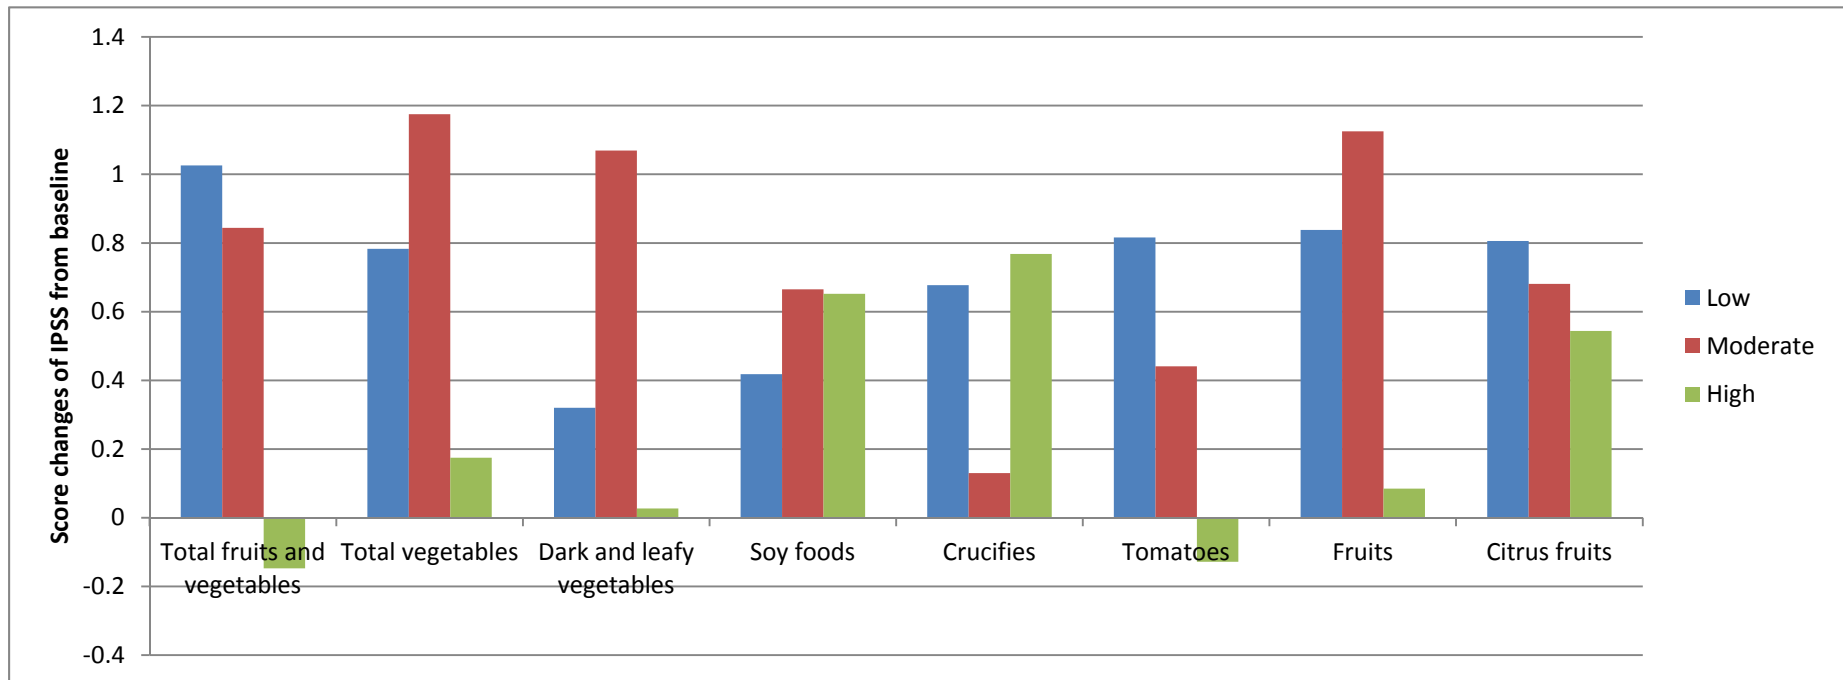

Title: Fruit and vegetable intake in relation to lower urinary tract symptoms and erectile dysfunction among Southern Chinese elderly men - a four-year prospective study of Mr OS Hong Kong

First author: Zhao-min Liu (PhD)

Supplemental Figure 2 Adjusted mean of absolute changes of IPSS in storage symptoms at 4-year follow-up by low, moderate and high fruit and/or vegetable intake

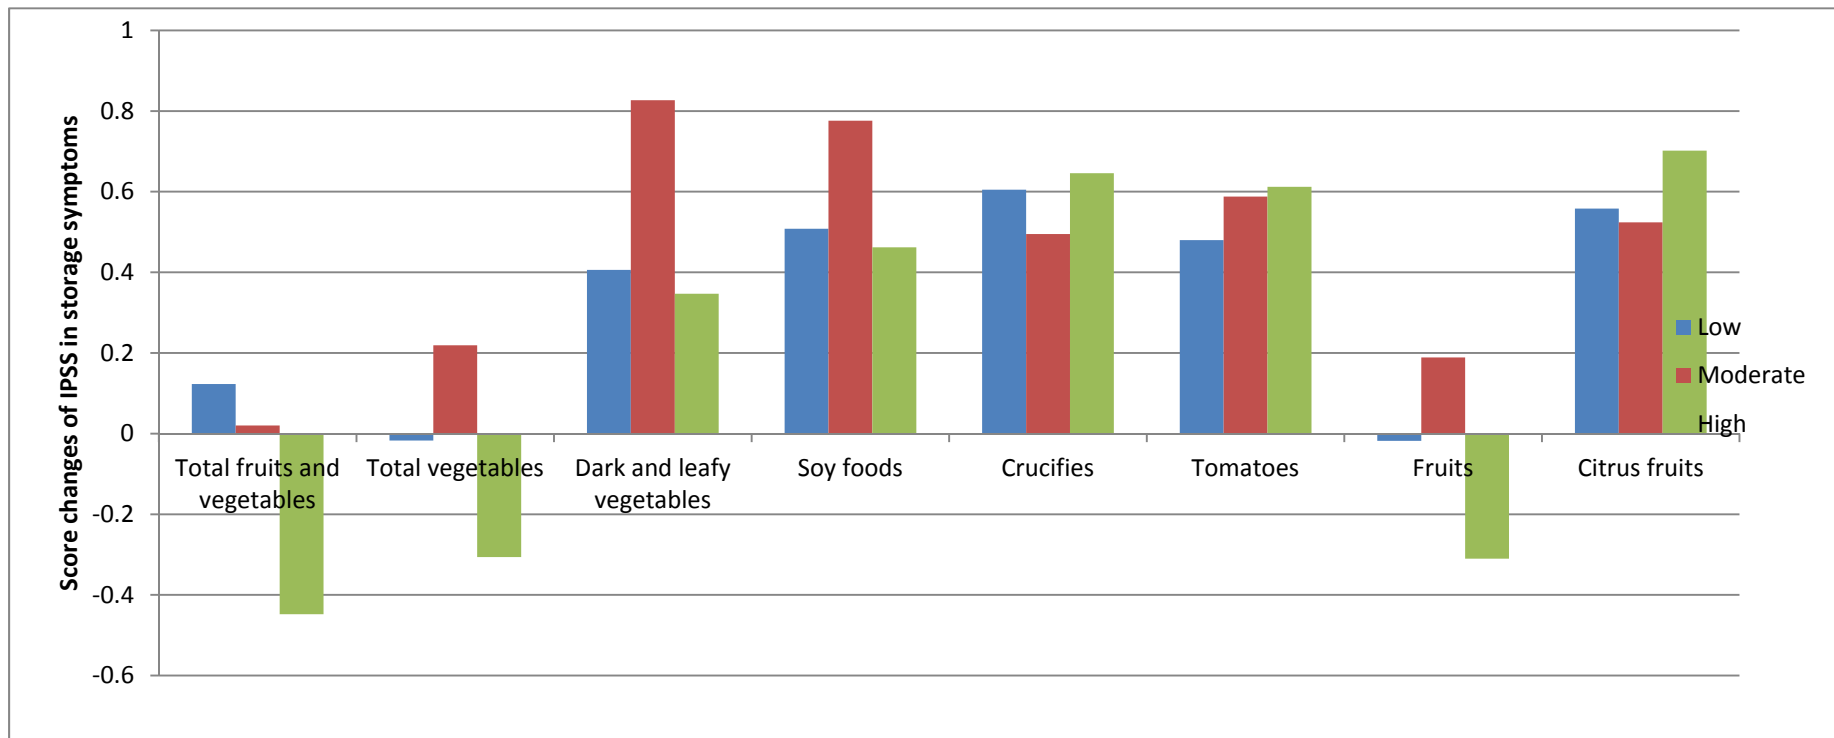

**Title: Fruit and vegetable intake in relation to lower urinary tract symptoms and erectile dysfunction among Southern Chinese elderly men - a four-year prospective study of Mr OS Hong Kong**

**First author: Zhao-min Liu (PhD)**

**Supplemental Figure 3 Adjusted mean of absolute changes of IPSS in voiding symptoms at 4-year follow-up by low, moderate and high fruit and/or vegetable intake**

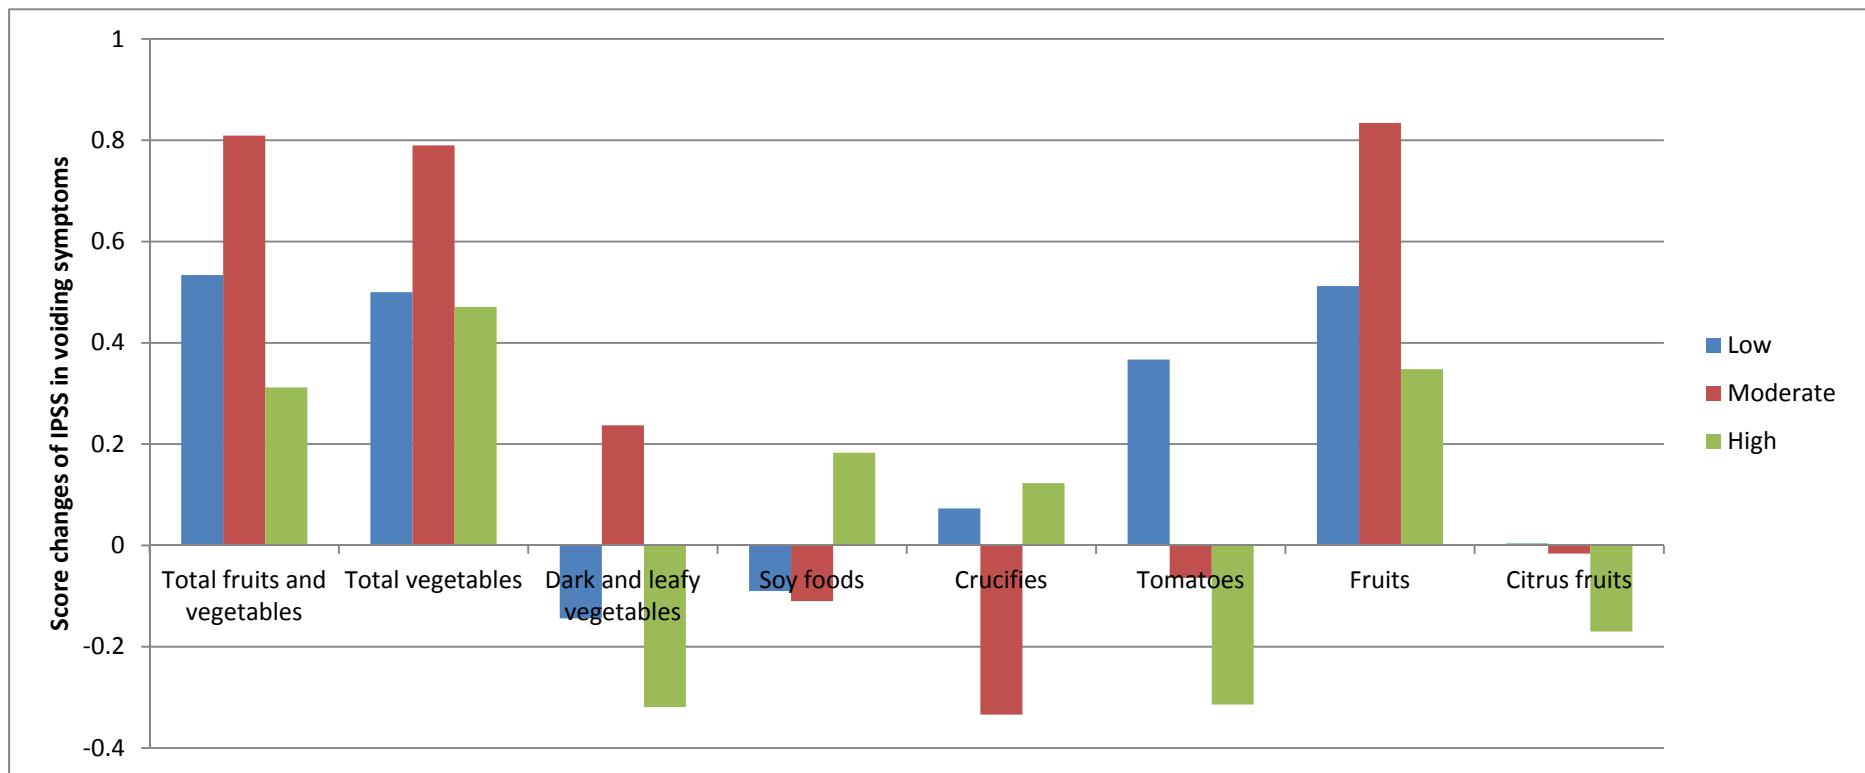

Supplement: medi-95-e2557-s001.pdf [file medi-95-e2557-s001.pdf]
